# Supplementary material
Source: PubMed Central journal article supplement (PMC4485526)
Supplement: NIHMS665233-supplement-1.pdf [file NIHMS665233-supplement-1.pdf]

**Table S1.** Demographic characteristics of study participants.

| Characteristic           | Pre-Donation Visit  |                    | 36 Month Visit     |                    | Study States (Weighted) <sup>1</sup> | United States <sup>2</sup> |
|--------------------------|---------------------|--------------------|--------------------|--------------------|--------------------------------------|----------------------------|
|                          | Controls (N=201)    | Donors (N=203)     | Controls (N=173)   | Donors (N=182)     |                                      |                            |
| Male                     | 32.3%               | 32.0%              | 34.1%              | 34.1%              | 40.3%                                | 39.8%                      |
| White ethnicity          | 95.0%               | 94.6%              | 95.4%              | 94.0%              | 85.7%                                | 69.7%                      |
| Age (years)              | 43.1±11.9           | 43.4±11.3          | 46.5±12.3          | 46.7±11.3          |                                      |                            |
| Age category             |                     |                    |                    |                    |                                      |                            |
| 18-34 years              | 30.9%               | 28.1%              | 23.7%              | 17.6%              | 33.4%                                | 33.2%                      |
| 35-49 years              | 35.3%               | 40.9%              | 32.4%              | 39.0%              | 42.8%                                | 44.6%                      |
| 50-64 years              | 31.3%               | 28.6%              | 39.3%              | 39.6%              | 21.9%                                | 20.9%                      |
| ≥65 years                | 2.5%                | 2.5%               | 4.6%               | 3.9%               | 1.8%                                 | 1.3%                       |
| BMI (kg/m <sup>2</sup> ) | 26.7±4.9<br>(200)   | 26.8±4.1<br>(201)  | 27.2±4.9<br>(173)  | 27.2±4.4<br>(181)  |                                      |                            |
| BMI category             |                     |                    |                    |                    |                                      |                            |
| <25 kg/m <sup>2</sup>    | 41.8%               | 36.5%              | 40.5%              | 35.2%              |                                      |                            |
| 25-30 kg/m <sup>2</sup>  | 35.3%               | 40.9%              | 32.4%              | 39.6%              |                                      |                            |
| 30-40 kg/m <sup>2</sup>  | 20.9%               | 20.7%              | 25.4%              | 23.6%              |                                      |                            |
| ≥40 kg/m <sup>2</sup>    | 1.5%                | 1.0%               | 1.7%               | 1.1%               |                                      |                            |
| BMI missing              | 0.5%                | 1.0%               | 0.0%               | 0.6%               |                                      |                            |
| Waist circ. (cm)         | 87.2±12.8<br>(181)  | 88.1±12.2<br>(174) | 88.7±13.2<br>(162) | 89.1±12.7<br>(173) |                                      |                            |
| Hip circ. (cm)           | 102.7±10.0<br>(170) | 103.1±9.8<br>(163) | 104.0±9.6<br>(162) | 103.8±8.4<br>(171) |                                      |                            |

Values are mean ± standard deviation and (N in parentheses) if different from complete sample.

Abbreviations: BMI, body mass index; circ., circumference.

<sup>1</sup>Among living kidney donors in the states with participating sites (Minnesota, Ohio, Maryland, Iowa, and California), weighted by the proportion of donors enrolled in those states.

<sup>2</sup>All living donors in the US that donated 2006-2010.
