# Supplementary material
Source: PubMed Central journal article supplement (PMC4485526)
Supplement: NIHMS665233-supplement-2.pdf [file NIHMS665233-supplement-2.pdf]

**Table S2.** Medication usage.

| <b>Drug Category</b>        | <b>Controls</b> | <b>Donors</b>  | <b>P-value<sup>a</sup></b> |
|-----------------------------|-----------------|----------------|----------------------------|
| <b>Antihypertensive</b>     |                 |                |                            |
| Visit 0                     | 10/201 (5.0%)   | 10/203 (4.9%)  | 0.9                        |
| Visit 6                     | 11/198 (5.6%)   | 9/201 (4.5%)   | 0.6                        |
| Visit 12                    | 14/193 (7.3%)   | 11/198 (5.6%)  | 0.5                        |
| Visit 24                    | 15/182 (8.2%)   | 12/185 (6.5%)  | 0.5                        |
| Visit 36                    | 14/173 (8.1%)   | 12/182 (6.6%)  | 0.6                        |
| <b>Statin</b>               |                 |                |                            |
| Visit 0                     | 12/201 (6.0%)   | 14/203 (6.9%)  | 0.7                        |
| Visit 6                     | 14/198 (7.1%)   | 14/201 (7.0%)  | 0.9                        |
| Visit 12                    | 17/193 (8.8%)   | 17/198 (8.6%)  | 0.9                        |
| Visit 24                    | 18/182 (9.9%)   | 14/185 (7.6%)  | 0.4                        |
| Visit 36                    | 16/173 (9.3%)   | 20/182 (11.0%) | 0.6                        |
| <b>Lipid-lowering agent</b> |                 |                |                            |
| Visit 0                     | 14/201 (7.0%)   | 16/203 (7.9%)  | 0.7                        |
| Visit 6                     | 16/198 (8.1%)   | 16/201 (8.0%)  | 0.9                        |
| Visit 12                    | 19/193 (9.8%)   | 20/198 (10.1%) | 0.9                        |
| Visit 24                    | 19/182 (10.4%)  | 18/185 (9.7%)  | 0.8                        |
| Visit 36                    | 17/173 (9.8%)   | 26/182 (14.3%) | 0.2                        |
| <b>Fish Oil</b>             |                 |                |                            |
| Visit 0                     | 18/201 (9.0%)   | 10/203 (4.9%)  | 0.1                        |
| Visit 6                     | 19/198 (9.6%)   | 15/201 (7.5%)  | 0.4                        |
| Visit 12                    | 19/193 (9.8%)   | 17/198 (8.6%)  | 0.7                        |
| Visit 24                    | 21/182 (11.5%)  | 22/185 (11.9%) | 0.9                        |
| Visit 36                    | 26/173 (15.0%)  | 24/182 (13.2%) | 0.6                        |
| <b>Antidepressant</b>       |                 |                |                            |
| Visit 0                     | 26/201 (12.9%)  | 27/203 (13.3%) | 0.9                        |
| Visit 6                     | 29/198 (14.7%)  | 32/201 (15.9%) | 0.7                        |
| Visit 12                    | 27/193 (14.0%)  | 29/198 (14.7%) | 0.9                        |
| Visit 24                    | 28/182 (15.4%)  | 26/185 (14.1%) | 0.7                        |
| Visit 36                    | 26/173 (15.0%)  | 26/182 (14.3%) | 0.8                        |
| <b>Vitamin D</b>            |                 |                |                            |
| Visit 0                     | 7/201 (3.5%)    | 7/203 (3.5%)   | 0.9                        |
| Visit 6                     | 9/198 (4.6%)    | 7/201 (3.5%)   | 0.6                        |

|                            |                |                |      |
|----------------------------|----------------|----------------|------|
| Visit 12                   | 11/193 (5.7%)  | 10/198 (5.1%)  | 0.8  |
| Visit 24                   | 19/182 (10.4%) | 13/185 (7.0%)  | 0.2  |
| Visit 36                   | 22/173 (12.7%) | 17/182 (9.3%)  | 0.3  |
| <b>Iron</b>                |                |                |      |
| Visit 0                    | 2/201 (1.0%)   | 2/203 (1.0%)   | 0.9  |
| Visit 6                    | 2/198 (1.0%)   | 5/201 (2.5%)   | 0.3  |
| Visit 12                   | 1/193 (0.5%)   | 4/198 (2.0%)   | 0.2  |
| Visit 24                   | 2/182 (1.1%)   | 3/185 (1.6%)   | 0.7  |
| Visit 36                   | 3/173 (1.7%)   | 3/182 (1.7%)   | 0.9  |
| <b>Multivitamin</b>        |                |                |      |
| Visit 0                    | 37/201 (18.4%) | 36/203 (17.7%) | 0.9  |
| Visit 6                    | 39/198 (19.7%) | 38/201 (18.9%) | 0.8  |
| Visit 12                   | 43/193 (22.3%) | 40/198 (20.2%) | 0.6  |
| Visit 24                   | 45/182 (24.7%) | 39/185 (21.1%) | 0.4  |
| Visit 36                   | 41/173 (23.7%) | 42/182 (23.1%) | 0.9  |
| <b>Thyroid replacement</b> |                |                |      |
| Visit 0                    | 8/201 (4.0%)   | 11/203 (5.4%)  | 0.5  |
| Visit 6                    | 7/198 (3.5%)   | 12/201 (6.0%)  | 0.3  |
| Visit 12                   | 7/193 (3.6%)   | 12/198 (6.1%)  | 0.3  |
| Visit 24                   | 6/182 (3.3%)   | 14/185 (7.6%)  | 0.07 |
| Visit 36                   | 6/173 (3.5%)   | 14/182 (7.7%)  | 0.08 |
| <b>Aspirin</b>             |                |                |      |
| Visit 0                    | 16/201 (8.0%)  | 16/203 (7.9%)  | 0.9  |
| Visit 6                    | 18/198 (9.1%)  | 17/201 (8.5%)  | 0.8  |
| Visit 12                   | 19/193 (9.8%)  | 20/198 (10.1%) | 0.9  |
| Visit 24                   | 19/182 (10.4%) | 24/185 (13.0%) | 0.5  |
| Visit 36                   | 21/173 (12.1%) | 24/182 (13.2%) | 0.8  |
| <b>NSAID</b>               |                |                |      |
| Visit 0                    | 10/201 (5.0%)  | 7/203 (3.5%)   | 0.4  |
| Visit 6                    | 13/198 (6.6%)  | 5/201 (2.5%)   | 0.05 |
| Visit 12                   | 16/193 (8.3%)  | 6/198 (3.0%)   | 0.02 |
| Visit 24                   | 12/182 (6.6%)  | 7/185 (3.8%)   | 0.2  |
| Visit 36                   | 12/173 (6.9%)  | 7/182 (3.9%)   | 0.2  |
| <b>No medications</b>      |                |                |      |
| Visit 0                    | 12/201 (6.0%)  | 16/203 (7.9%)  | 0.4  |
| Visit 6                    | 12/198 (6.1%)  | 20/201 (10.0%) | 0.2  |

|          |               |                |      |
|----------|---------------|----------------|------|
| Visit 12 | 11/193 (5.7%) | 22/198 (11.1%) | 0.05 |
| Visit 24 | 12/182 (6.6%) | 18/185 (9.7%)  | 0.3  |
| Visit 36 | 16/173 (9.3%) | 16/182 (8.8%)  | 0.9  |

---

<sup>a</sup>Chi-Square
