# Supplementary material
Source: PubMed Central journal article supplement (PMC4485526)
Supplement: NIHMS665233-supplement-3.pdf [file NIHMS665233-supplement-3.pdf]

**Table S3.** Blood pressure medications and increased blood pressure.

| <b>BP Category</b>                      | <b>Controls</b> | <b>Donors</b>  | <b>P Value<sup>a</sup></b> |
|-----------------------------------------|-----------------|----------------|----------------------------|
| <b>BP ≥ 140/90 mm Hg</b>                |                 |                |                            |
| Visit 0                                 | 11/201(5.5%)    | 6/203 (3.0%)   | 0.2                        |
| Visit 6                                 | 7/198 (3.5%)    | 8/ 201 (4.0%)  | 0.8                        |
| Visit 12                                | 10/193 (5.2%)   | 7/198 (3.5%)   | 0.4                        |
| Visit 24                                | 11/182 (6.0%)   | 5/185 (2.7%)   | 0.1                        |
| Visit 36                                | 10/173 (5.8%)   | 10/182 (5.5%)  | 0.9                        |
| <b>Antihypertensive</b>                 |                 |                |                            |
| Visit 0                                 | 10/201 (5.0%)   | 10/203 (4.9%)  | 1.0                        |
| Visit 6                                 | 11/198 (5.6%)   | 9/201 (4.5%)   | 0.6                        |
| Visit 12                                | 14/193 (7.3%)   | 11/198 (5.6%)  | 0.5                        |
| Visit 24                                | 15/182 (8.2%)   | 12/185 (6.5%)  | 0.5                        |
| Visit 36                                | 14/173 (8.1%)   | 12/182 (6.6%)  | 0.6                        |
| <b>Hypertension<sup>b</sup></b>         |                 |                |                            |
| Visit 0                                 | 20/201 (10.0%)  | 16/203 (7.9%)  | 0.5                        |
| Visit 6                                 | 18/198 (9.1%)   | 17/201 (8.5%)  | 0.8                        |
| Visit 12                                | 23/193 (11.9%)  | 16/198 (8.1%)  | 0.2                        |
| Visit 24                                | 23/182 (12.6%)  | 15/185 (8.1%)  | 0.2                        |
| Visit 36                                | 22/173 (12.7%)  | 20/182 (11.0%) | 0.6                        |
| <b>BP Poorly Controlled<sup>c</sup></b> |                 |                |                            |
| Visit 0                                 | 1/201 (0.5%)    | 0/203 (0.0%)   | 0.3                        |
| Visit 6                                 | 0/198 (0.0%)    | 0/201 (0.0%)   | ---                        |
| Visit 12                                | 1/193 (0.5%)    | 2/198 (1.0%)   | 0.6                        |
| Visit 24                                | 3/182 (1.7%)    | 2/185 (1.1%)   | 0.6                        |
| Visit 36                                | 2/173 (1.2%)    | 2/182 (1.1%)   | 1.0                        |

<sup>a</sup>Chi-Square

<sup>b</sup>Defined as *either* BP≥ 140/90 *or* taking antihypertensive medication.

<sup>c</sup>Defined as *both* BP≥ 140/90 *and* taking antihypertensive medication.

Abbreviation: BP, blood pressure.
