# Supplementary material
Source: PubMed Central journal article supplement (PMC4485526)
Supplement: NIHMS665233-supplement-4.pdf [file NIHMS665233-supplement-4.pdf]

**Table S4.** Studies examining the incidence of hypertension in donors compared to controls.

| Study                          | N                           | Follow-up (y)     | Systolic BP mm Hg                               | Diastolic BP mm Hg                             | HTN-Donors (%)   | Used BP Medications (%) |
|--------------------------------|-----------------------------|-------------------|-------------------------------------------------|------------------------------------------------|------------------|-------------------------|
| Boudville (2005) <sup>12</sup> | 157 Donors<br>(4 studies)   | 10.4 <sup>1</sup> | ↑6 (95% CI<br>1.6-10.5)<br>donors v<br>controls | NA                                             | NA               | NA                      |
|                                | 128 Controls<br>(4 studies) | 10.1 <sup>1</sup> |                                                 |                                                | NA               | NA                      |
|                                | 196 Donors<br>(5 studies)   | 9.6 <sup>1</sup>  | NA                                              | ↑4 (95% CI<br>0.9-6.7)<br>donors v<br>controls | NA               | NA                      |
|                                | 161 Controls<br>(5 studies) | 9.2 <sup>1</sup>  |                                                 |                                                | NA               | NA                      |
| Garg(2008) <sup>13</sup>       | 1278 Donors                 | 6.2±3.2           | NA                                              | NA                                             | 16.3             | NA                      |
|                                | 6369 Controls               | 6.2±3.2           | NA                                              | NA                                             | 11.9*            | NA                      |
| Ibrahim(2009) <sup>14</sup>    | 255 Donors                  | 12.2±9.2          | 121.8±14.6                                      | 73.0±8.9                                       | NA               | 24.7                    |
|                                | 255 Controls                | NA                | 125.9±19.1*                                     | 71.0±16.5                                      | NA               | 28.8                    |
| Doshi (2013) <sup>15</sup>     | 103 Donors                  | 6.8±2.3           | 125 ± 15                                        | 80 ± 11                                        | 40.8             | NA                      |
|                                | 235 Controls                | 6.4±2.2           | 118 ± 14*                                       | 77 ± 11*                                       | 17.9*            | NA                      |
| Lentine(2010) <sup>16</sup>    | 4650 Donors                 | 5.0               | NA                                              | NA                                             | 17.8 (15.8-20.2) | 13.6 (11.4-15.8)        |
|                                | Age 40 Female               |                   |                                                 |                                                |                  |                         |
|                                | Non-Hispanic white          | NA                | NA                                              | NA                                             | 13.9 (11.5–16.2) | NA                      |
|                                | (compared to NHANES)        | NA                | NA                                              | NA                                             | 16.4 (13.3–19.9) | NA                      |
|                                | Hispanic                    | NA                | NA                                              | NA                                             | 18.4 (13.4–23.1) | NA                      |
|                                | (compared to NHANES)        | NA                | NA                                              | NA                                             | 10.4 (8.5–12.7)  | NA                      |
|                                | Non-Hispanic black          | NA                | NA                                              | NA                                             | 20.3 (15.8–24.5) | NA                      |
| (compared to NHANES)           | NA                          | NA                | NA                                              | 24.0 (21.8–26.3)                               | NA               |                         |

Age 40 Male

|                      |    |    |    |                  |    |
|----------------------|----|----|----|------------------|----|
| Non-Hispanic white   | NA | NA | NA | 15.6 (12.9–18.1) | NA |
| (compared to NHANES) | NA | NA | NA | 15.5 (12.8–18.5) | NA |
| Hispanic             | NA | NA | NA | 20.6 (14.9–25.8) | NA |
| (compared to NHANES) | NA | NA | NA | 9.8 (7.9–12.0)   | NA |
| Non-Hispanic black   | NA | NA | NA | 22.7 (17.7–27.4) | NA |
| (compared to NHANES) | NA | NA | NA | 24.4 (22.3–26.7) | NA |

Age 55 Female

|                      |    |    |    |                  |    |
|----------------------|----|----|----|------------------|----|
| Non-Hispanic white   | NA | NA | NA | 31.5 (27.1–35.7) | NA |
| (compared to NHANES) | NA | NA | NA | 32.5 (28.4–36.8) | NA |
| Hispanic             | NA | NA | NA | 40.2 (30.5–48.6) | NA |
| (compared to NHANES) | NA | NA | NA | 21.6 (18.1–25.6) | NA |
| Non-Hispanic black   | NA | NA | NA | 43.7 (35.3–51.1) | NA |
| (compared to NHANES) | NA | NA | NA | 42.8 (40.0–45.8) | NA |

Age 55 Male

|                      |    |    |    |                  |    |
|----------------------|----|----|----|------------------|----|
| Non-Hispanic white   | NA | NA | NA | 34.9 (29.8–39.6) | NA |
| (compared to NHANES) | NA | NA | NA | 31 (27.7–36.8)   | NA |
| Hispanic             | NA | NA | NA | 44.2 (33.3–53.3) | NA |
| (compared to NHANES) | NA | NA | NA | 20.5 (16.9–24.5) | NA |
| Non-Hispanic black   | NA | NA | NA | 47.9 (38.5–55.8) | NA |
| (compared to NHANES) | NA | NA | NA | 44.3 (41.3–47.5) | NA |

---

<sup>1</sup>Mean weighted years after donation.

\*P<0.05 compared to controls.

Abbreviations: HTN, hypertension; BP, blood pressure; NA, not available.
