# Supplementary material
Source: PubMed Central journal article supplement (PMC4485526)
Supplement: NIHMS665233-supplement-5.pdf [file NIHMS665233-supplement-5.pdf]

**Table S5.** Results of studies of 24 hour ambulatory blood pressure monitoring (none with non-donor controls).

| Study                         | N                        | Follow-up      | Mean 24H | Mean Day | Mean Night | HTN        | BP Meds.   | Night/Day Systolic | Night/Day Diastolic | Night/Day MAP | Non-Dip |
|-------------------------------|--------------------------|----------------|----------|----------|------------|------------|------------|--------------------|---------------------|---------------|---------|
| Eberhard (1997) <sup>48</sup> | 29                       | 11.1±3.8 years | NA       | NA       | NA         | 29%>130/80 | 17.2%      | NA                 | NA                  | NA            | 6.9%    |
| Siebels (2003) <sup>49</sup>  | 100 <sup>1</sup>         | NA             | NA       | 125/80   | 110/60     | 7%         | NA         | NA                 | NA                  | NA            | NA      |
| Textor (2004) <sup>50</sup>   | 124 (Normal)             | Pre            | NA       | 121/75   | 108/63     | 5%>135/85  | NA         | -13 mm Hg          | -11 mm Hg           | NA            | NA      |
|                               |                          | 6-12 months    | NA       | 120/75   | 107/61     | NA         | NA         | -14 mm Hg          | -14 mm Hg           | NA            | NA      |
|                               |                          | 24 (HTN)       | Pre      | NA       | 142/85     | 132/80     | 75%>135/85 | 70.8%              | -19 mm Hg           | -15 mm Hg     | NA      |
|                               |                          | 6-12 months    | NA       | 125/72   | 116/68     | NA         | NA         | -17 mm Hg          | -12 mm Hg           | NA            | NA      |
| Goto (2005) <sup>51</sup>     | 15 <sup>2</sup>          | Pre            | 122/76   | 125/77   | 112/70     | 0%         | 0%         | NA                 | NA                  | 0.89±0.01     | NA      |
|                               |                          | 8 days         | 125/78   | 128/80   | 116/73     | 0%         | 0%         | NA                 | NA                  | 0.91±0.02     | NA      |
| Prasad (2009) <sup>52</sup>   | 58 (of 129) <sup>3</sup> | Pre            | 116/71   | 121/75   | 106/64     | 0%>135/85  | 0%         | 0.87±0.07          | 0.85±0.09           | 0.86±0.07     | 32.8%   |
|                               |                          | 6 months       | 113/70   | 118/73   | 103/62     | NA         | NA         | 0.87±0.09          | 0.84±0.09           | 0.85±0.08     | 20.7%   |
| Prasad (2010) <sup>53</sup>   | 35 dippers <sup>3</sup>  | Pre            | 115/71   | 122/76   | 101/62     | 0%>135/85  | NA         | 0.83±0.05          | 0.82±0.10           | NA            | 0%      |
|                               |                          | 12 months      | 111/69   | 119/74   | 99/61      | 0%>135/85  | NA         | 0.85±0.09          | 0.83±0.09           | NA            | 0%      |
|                               | 16 non-dip <sup>3</sup>  | Pre            | 116/70   | 117/73   | 112/65     | 0%>135/85  | NA         | 0.95±0.04          | 0.95±0.04           | NA            | 100%    |
|                               |                          | 12 months      | 114/70   | 116/72   | 109/65     | 0%>135/85  | NA         | 0.94±0.07          | 0.94±0.07           | NA            | 100%    |

<sup>1</sup>Out of 160 donors from October 1994 to October 200.

<sup>2</sup>Between July 2003 and January 2004, 24 there were kidney donors with 15 consecutive patients who gave consent were enrolled in this study.

<sup>3</sup>Between October 1, 2004 and April 30, 2007 there were 129 consecutive donors

Note: values are means  $\pm$ standard deviations, except for Goto, et al., that reported standard errors.

Abbreviations: HTN, hypertension; BP Meds., antihypertensive medication use; NA, not available.
