# Supplementary material
Source: PubMed Central journal article supplement (PMC4485526)
Supplement: NIHMS665233-supplement-6.pdf [file NIHMS665233-supplement-6.pdf]

**Table S6.** Serum electrolytes and urine Ph at 6, 12, 24, and 36 months after kidney donation.

| Test                           | Groups   | Visit (Months after donation) |                    |                    |                    | P-Values <sup>a</sup>       |                    |                           |
|--------------------------------|----------|-------------------------------|--------------------|--------------------|--------------------|-----------------------------|--------------------|---------------------------|
|                                |          | 6 Months                      | 12 Months          | 24 Months          | 36 Months          | Donors v. Con. <sup>b</sup> | Visit <sup>c</sup> | Interac-tion <sup>d</sup> |
| Serum potassium (mmol/L)       | Controls | 4.14±0.32<br>(197)            | 4.10±0.29<br>(187) | 4.12±0.31<br>(177) | 4.11±0.28<br>(172) | 0.006                       | 0.1                | 1.0                       |
|                                | Donors   | 4.20±0.29<br>(199)            | 4.19±0.35<br>(193) | 4.20±0.32<br>(181) | 4.17±0.27<br>(178) |                             |                    |                           |
| Serum sodium (mmol/L)          | Controls | 138.5±2.0<br>(198)            | 138.5±1.9<br>(193) | 138.9±1.9<br>(182) | 139.1±2.1<br>(173) | 0.8                         | 0.001              | 0.8                       |
|                                | Donors   | 138.5±1.8<br>(200)            | 138.7±1.9<br>(196) | 138.9±1.9<br>(185) | 139.2±2.0<br>(182) |                             |                    |                           |
| Serum chloride (mmol/L)        | Controls | 103.1±2.1<br>(198)            | 103.4±2.1<br>(193) | 103.6±2.1<br>(182) | 103.8±2.2<br>(173) | 0.3                         | 0.001              | 0.4                       |
|                                | Donors   | 103.3±2.1<br>(200)            | 103.5±2.1<br>(196) | 103.6±2.1<br>(185) | 103.9±2.2<br>(182) |                             |                    |                           |
| Serum CO <sub>2</sub> (mmol/L) | Controls | 25.8±4.0<br>(198)             | 25.8±4.1<br>(193)  | 25.9±4.2<br>(171)  | 26.1±25.2<br>(122) | 0.6                         | 0.3                | 0.2                       |
|                                | Donors   | 25.8±3.7<br>(200)             | 25.3±3.7<br>(196)  | 25.5±3.5<br>(177)  | 25.2±3.0<br>(128)  |                             |                    |                           |
| Urine pH                       | Controls | 6.1±0.8<br>(186)              | 6.2±0.8<br>(183)   | 6.0±0.8<br>(167)   | 6.1±0.8<br>(157)   | 0.2                         | 0.4                | 0.9                       |
|                                | Donors   | 6.1±0.8<br>(193)              | 6.1±0.8<br>(191)   | 6.0±0.7<br>(177)   | 6.0±0.8<br>(172)   |                             |                    |                           |

Note: Values are given as mean ± standard deviation.

Abbreviations and definitions: CO<sub>2</sub>, total carbon dioxide.

<sup>a</sup>Analysis of variance with repeated measures. Each variable was analyzed separately and no adjustment was made for multiple comparisons. Values not normally distributed were logarithmically transformed before analysis.

<sup>b</sup>Donors versus controls P values test overall differences between donors and controls.

<sup>c</sup>Visit P values test differences between the 4 visits .

<sup>d</sup>Interaction P values test the interaction between donors versus controls and between visits.
